# Supplementary material for: The AWA Prehospital Scoring System Predicts 30-Day Mortality After Out-of-Hospital Cardiac Arrest with High Accuracy: An SOS-KANTO 2017 Registry Study
Source: Research Square preprint supplement (doi:10.21203/rs.3.rs-8513452/v1), 2026-02-03
Supplement: Supplementary file 1 [file ec5464da97679f302b499f75.docx]

**Supplementary Table S1: Variable list**

| **Variable** | **Category/Unit** |
| --- | --- |
| **Demographics** |  |
| Age | Years, mean ± SD |
| Age category | <69 years, 70-79 years, 81-90 years, >90 years |
| Sex | Male, Female |
| **Cardiac Arrest Characteristics** |  |
| Witnessed arrest | Yes, No |
| Bystander CPR | Yes, No |
| Initial rhythm | Asystole, Others |
| **Laboratory Data** |  |
| Initial pH | Mean ± SD |
| Initial lactate | mmol/L, mean ± SD |
| Interventions |  |
| Epinephrine administration | No, Yes, Unknown |
| ROSC during transport | No, Yes, Unknown |
| CAG performed | Yes, No |
| PCI performed | Yes, No |
| TTM performed | Yes, No |
| **Comorbidities** |  |
| Myocardial infarction | Yes, No |
| Heart failure | Yes, No |
| Cerebral infarction | Yes, No |
| Dementia | Yes, No |
| Chronic obstructive pulmonary disease | Yes, No |
| Diabetes without complications | Yes, No |
| Diabetes with complications | Yes, No |
| Paralysis | Yes, No |
| Chronic kidney disease | Yes, No |
| Hemodialysis | Yes, No |
| Hypertension | Yes, No |
| Atrial fibrillation | Yes, No |
| **Outcome Variable** |  |
| 30 days mortality | Survival, Death |

Abbreviations: SD: Standard deviation; CPR: Cardiopulmonary resuscitation; ROSC: Return of spontaneous circulation; CAG: Coronary angiography; PCI: Percutaneous coronary intervention; TTM: Targeted temperature.

**Supplementary Table S2:** Model performance measures in the predictive model for 30-day mortality (n = 9,120).

| **Performance Measure** | **Value (95% CI)** |
| --- | --- |
| **Overall fit** |  |
| Brier score | 0.05 (0.05 - 0.06) |
| **Calibration** |  |
| Calibration‐in‐the‐large | 0.00 (-0.09 - 0.09) |
| Calibration slope | 1.00 (0.92 - 1.09) |
| Integrated calibration slope | 1.01 (0.90 - 1.11) |
| Observed/Expected ratio | 1.07 |
| **Discrimination** |  |
| C‑statistic (AUROC) | 0.84 |
| Pseudo R² | 0.21 |
| LR χ² | 874.55 |

**Abbreviations**: AUCROC, Area Under the Receiver Operating Characteristic Curve; CI, Confidence Interval; LR χ², Likelihood ratio chi-square test

**Supplementary Table S3:** Results of the 10-fold cross-validation of the 30-day mortality predictive model.

| Fold | N (Training Set) | Pseudo R² | 70–79 years OR (95% CI) | 80–89 years OR (95% CI) | > 90 years  OR (95% CI) | Asystole  OR (95% CI) | No witness OR (95% CI) | AUC  (95% CI) |
| --- | --- | --- | --- | --- | --- | --- | --- | --- |
| 1 | 8,204 | 0.21 | 1.91  (1.52 - 2.40) | 3.19  (2.43 - 4.18) | 8.18  (4.00 - 16.72) | 13.22  (9.75 -17.92) | 1.71  (1.37 -2.15) | 0.79  (0.74 -0.85) |
| 2 | 8,212 | 0.20 | 1.76  (1.40 - 2.21) | 3.01  (2.30 - 3.94) | 6.34  (3.33 - 12.08) | 11.86  (8.81 -15.97) | 1.87  (1.49 -2.35) | 0.84  (0.80 -0.90) |
| 3 | 8,205 | 0.22 | 1.85  (1.47 - 2.32) | 3.00  (2.29 - 3.92) | 7.02  (3.57 - 13.82) | 13.22  (9.68 -18.05) | 2.06  (1.63 -2.61) | 0.77  (0.72 -0.83) |
| 4 | 8,222 | 0.21 | 1.73  (1.38 - 2.17) | 3.08  (2.35 - 4.04) | 6.83  (3.47 - 13.45) | 12.45  (9.19 -16.87) | 2.00  (1.59 -2.52) | 0.80  (0.75 -0.85) |
| 5 | 8,206 | 0.20 | 1.69  (1.35 - 2.13) | 2.88  (2.20 - 3.76) | 5.44  (2.93 - 10.08) | 11.87  (8.83 -15.96) | 1.87  (1.49 -2.35) | 0.86  (0.82 -0.90) |
| 6 | 8,200 | 0.21 | 1.65  (1.32 - 2.07) | 2.93  (2.24 - 3.83) | 5.46  (2.94 - 10.12) | 13.12  (9.68 -17.78) | 1.82  (1.45 -2.29) | 0.83  (0.78 -0.88) |
| 7 | 8,206 | 0.20 | 1.75 (1.39 - 2.20) | 3.02  (2.31 - 3.93) | 6.33  (3.33 - 12.06) | 12.32  (9.13 -16.62) | 1.77  (1.41 -2.22) | 0.86  (0.82 -0.91) |
| 8 | 8,204 | 0.20 | 1.81  (1.44 - 2.28) | 3.22  (2.45 - 4.22) | 5.65  (3.05 - 10.47) | 11.43  (8.52 -15.33) | 1.90  (1.51 -2.39) | 0.85  (0.81 -0.89] |
| 9 | 8,212 | 0.20 | 1.71  (1.36 - 2.14) | 3.11  (2.37 - 4.08) | 5.64  (3.04 - 10.45) | 11.03  (8.22 -14.79) | 2.02  (1.60 -2.54) | 0.85  (0.80 -0.90) |
| 10 | 8,209 | 0.20 | 1.73  (1.37 - 2.17) | 3.01  (2.30 - 3.94) | 6.66  (3.38 - 13.11) | 11.69  (8.70 -15.719 | 1.85  (1.47 -2.32) | 0.86  (0.81 -0.90) |
| Pooled | 8,208 (8,200 -8,222) | 0.21  (0.20-0.22) | 1.76  (1.65 - 1.91) | 3.05  (2.88 - 3.22) | 6.36  (5.44 - 8.18) | 12.22  (11.03 -13.22) | 1.89  (1.71 -2.06) | 0.83  (0.77 -0.86) |

**Abbreviations**: Odds Ratio, OR; CI, Confidence Interval; AUC, Area Under the Curve

**Supplementary Figure 1**: ROC curve demonstrating model performance (AUC = 0.82).

**Abbreviations:** AUC, area under the curve; ROC, receiver operating characteristic

**Supplementary Figure 2:** Calibration plot.

**Supplementary Mathematical Formulas:** Mathematical formulation of the predictive model

These odds ratios were converted to log-odds coefficients using natural logarithms. Thus, the corresponding logit-form logistic regression equation is as follows:

logit[P(death)] = ln (3.13) + ln (1.76) * I (70–79 years) + ln (3.04) * I (80–89 years) + ln(6.27) * I (≥90 years) + ln (12.18) * I (asystole present) + ln (1.88) * I (unwitnessed arrest)

In this equation, I (condition) denotes an indicator variable that takes the value of 1 if the condition is met and 0 otherwise. For example, for a patient aged 75 years, I (70-79 years) = 1, whereas the other age indicators were 0.
